# Supplementary material for: Indenyl-functionalised triethylborane adduct of N-heterocyclic carbene: stepwise coordination of indenyl and NHC ligands toward molybdenum fragment
Source: Royal Society of Chemistry journal article supplement (doi:10.1039/c0dt01641a), 2011-01-01
Supplement: c0dt01641a.pdf [file c0dt01641a.pdf]

## Electronic Supplementary Information for

### Indenyl-Functionalised Triethylborane Adduct of *N*-Heterocyclic Carbene: Stepwise Coordination of Indenyl and NHC Ligands toward Molybdenum Fragment

Daichi Takaki,<sup>a</sup> Tetsuya Okayama,<sup>a</sup> Hiroshi Shuto,<sup>a</sup> Sawako Matsumoto,<sup>a</sup>  
Yoshitaka Yamaguchi,<sup>\*a</sup> and Shinya Matsumoto<sup>b</sup>

<sup>a</sup> *Department of Advanced Materials Chemistry, Graduate School of Engineering, Yokohama National University, Tokiwadai 79-5, Hodogaya-ku, Yokohama 240-8501, Japan*

<sup>b</sup> *Course of Environmental Science, Faculty of Education and Human Science, Yokohama National University, Tokiwadai 79-2, Hodogaya-ku, Yokohama 240-8501, Japan*

#### Contents

- S1. Experimental
  - S1-1. General procedures
  - S1-2. Preparation of **1a** and **1b**
  - S1-3. Preparation of **2a** and **2b**
  - S1-4. Preparation of **4a**
  - S1-5. Preparation of **5a**
  - S1-6. Preparation of **7a**
- S2. Single-crystal X-ray crystallography
  - S2-1. Experimental procedure for X-ray analyses
  - Table S1. Summary of Crystal Data for Complexes **4a**, **5a**, and **7a**
  - Figure S1. ORTEP drawing of **4a**
  - Figure S2. ORTEP drawing of **5a**
  - Figure S3. ORTEP drawing of **7a**
- S3. References

## S1. Experimental

### S1-1. General procedures

All manipulations involving air- and moisture-sensitive organometallic compounds were carried out under an atmosphere of dry argon or nitrogen, which was purified by SICAPENT (Merck Co., Inc.), by using a standard Schlenk tube or high vacuum techniques. All solvents were distilled over appropriate drying agents prior to use.  $\beta$ -Bromoethylindene,<sup>1</sup> 1-isopropylimidazole,<sup>2</sup> and molybdenum complexes **3**<sup>3</sup> and **6**<sup>4</sup> were prepared according to literature methods. Another reagents employed in this research were commercially available and used without further purification.

IR spectra were recorded on a HORIBA FT-730 spectrometer. <sup>1</sup>H, <sup>13</sup>C{<sup>1</sup>H} and <sup>11</sup>B{<sup>1</sup>H} NMR spectra were recorded on JEOL EX-270, AL-400, and BRUKER DRX-300, DRX-500, and AVANCE III 600 spectrometers at ambient temperature, unless otherwise mentioned. <sup>1</sup>H and <sup>13</sup>C{<sup>1</sup>H} NMR chemical shifts were recorded in ppm relative to internal Me<sub>4</sub>Si. <sup>11</sup>B{<sup>1</sup>H} NMR chemical shifts were recorded in ppm relative to external BF<sub>3</sub>·OEt<sub>2</sub>. All coupling constants were recorded in Hz. Multiplicity is indicated by s (singlet), d (doublet), t (triplet), q (quartet), sept (septet), and m (multiplet). Elemental analyses were performed on a Perkin-Elmer 240C. High-resolution mass spectra (HRMS) were obtained using the electrospray ionization (ESI) method with HITACHI NanoFrontier LD.

### S1-2. Preparation of **1a** and **1b**

1-Methylimidazole (391 mg, 4.76 mmol) and  $\beta$ -bromoethylindene (1036 mg, 4.64 mmol) were put in a Schlenk tube. After stirring at room temperature for ca. 48 h, the product was washed with ether (10 mL x 4) and then dried in vacuo to give compound **1a** as a white solid (863 mg, 2.83 mmol, 61%). <sup>1</sup>H NMR (in CDCl<sub>3</sub>):  $\delta$  3.21 (t,  $J$  = 7.2 Hz, 2H, indenyl-CH<sub>2</sub>CH<sub>2</sub>-N), 3.32 (s, 2H, CH<sub>2</sub> in indenyl), 4.01 (s, 3H, N-CH<sub>3</sub>), 4.67 (t,  $J$  = 7.2 Hz, 2H, N-CH<sub>2</sub>CH<sub>2</sub>-indenyl), 6.37 (s, 1H, CH in indenyl), 7.19 (t,  $J$  = 7.3 Hz, 1H, CH in indenyl), 7.26 (t,  $J$  = 7.3 Hz, 1H, CH in indenyl), 7.36 (d,  $J$  = 7.5 Hz, 1H, CH in imidazole), 7.43 (d,  $J$  = 7.3 Hz, 1H, CH in imidazole), 7.46 (broad-s, 1H, CH in indenyl), 7.54 (broad-s, 1H, CH in indenyl), 10.26 (s, 1H, N-CH-N). <sup>13</sup>C{<sup>1</sup>H} NMR (in CDCl<sub>3</sub>):  $\delta$  28.5 (indenyl-CH<sub>2</sub>CH<sub>2</sub>-N), 36.4 (N-CH<sub>3</sub>), 37.9 (CH<sub>2</sub> in indenyl), 48.4 (N-CH<sub>2</sub>-CH<sub>2</sub>-indenyl), 118.5 (CH in imidazole), 122.3, 123.2 (CH in indenyl), 123.8 (CH in imidazole), 125.0, 126.1, 131.2 (CH in indenyl), 137.1 (N-CH-N), 138.4, 143.6, 143.9 (quaternaryC in indenyl). HRMS (ESI) calcd for

$C_{15}H_{17}N_2 [M-Br]^+$ : 225.1386, found: 225.1386.

Compound **1b** was prepared from 1-isopropylimidazole (304 mg, 2.76 mmol) and  $\beta$ -bromoethylindene (635 mg, 2.85 mmol) in the same manner as that for **1a**. Compound **1b** was isolated as orange oil (579 mg, 1.74 mmol, 63%).  $^1H$  NMR (in  $CDCl_3$ ):  $\delta$  1.53 (d,  $J = 6.9$  Hz, 6H,  $CH_3$  in *i*-Pr), 3.24 (t,  $J = 6.9$  Hz, 2H, indenyl- $CH_2CH_2$ -N), 3.33 (s, 2H,  $CH_2$  in indenyl), 4.72 (t,  $J = 6.9$  Hz, 2H, N- $CH_2CH_2$ -indenyl), 4.78 (sept,  $J = 6.9$  Hz, 1H,  $CH$  in *i*-Pr), 6.41 (s, 1H,  $CH$  in indenyl), 7.19 (t,  $J = 7.6$  Hz, 1H,  $CH$  in indenyl), 7.24 (t,  $J = 7.6$  Hz, 1H,  $CH$  in indenyl), 7.34 (d,  $J = 7.6$  Hz, 1H,  $CH$  in imidazole), 7.43 (d,  $J = 7.3$  Hz, 1H,  $CH$  in imidazole), 7.46-7.48 (m, 2H,  $CH$  in indenyl), 10.43 (s, 1H, N- $CH$ -N).  $^{13}C\{^1H\}$  NMR (in  $CDCl_3$ ):  $\delta$  22.9 ( $CH_3$  in *i*-Pr), 28.5 (indenyl- $CH_2CH_2$ -N), 37.9 ( $CH_2$  in indenyl), 48.7 (N- $CH_2$ - $CH_2$ -indenyl), 53.1 ( $CH$  in *i*-Pr), 118.5 ( $CH$  in imidazole), 119.7, 122.5 ( $CH$  in indenyl), 123.9 ( $CH$  in imidazole), 125.0, 126.1, 131.4 ( $CH$  in indenyl), 135.8 (N- $CH$ -N), 138.6, 143.8, 143.9 (quaternary C in indenyl). HRMS (ESI) calcd for  $C_{17}H_{21}N_2 [M-Br]^+$ : 253.1699, found: 253.1705.

### S1-3. Preparation of **2a** and **2b**

Compound **1a** (3710 mg, 12.16 mmol) was put in a Schlenk tube, which was attached to a high-vacuum line. THF (ca. 50 mL) was added by a trap-to-trap-transfer technique at  $-78$  °C. At this temperature,  $LiBEt_3H$  (12.2 mL of its 1.0 M THF solution, 12.2 mmol) was added by syringe. Then the reaction mixture was allowed to warm to room temperature for 12 h. After removing the volatiles under reduced pressure, the residual oil was extracted with toluene (30 mL). The volatiles were removed under reduced pressure to give **2a** (3743 mg, 11.61 mmol, 95%).  $^1H$  NMR (in  $CDCl_3$ ):  $\delta$  0.50 (q,  $J = 7.6$  Hz, 6H,  $BCH_2CH_3$ ), 0.67 (t,  $J = 7.6$  Hz, 9H,  $BCH_2CH_3$ ), 3.03 (broad-t,  $J = 7.6$  Hz, 2H, indenyl- $CH_2CH_2$ -N), 3.35 (d,  $J = 1.5$  Hz, 2H,  $CH_2$  in indenyl), 3.85 (s, 3H, N- $CH_3$ ), 4.57 (t,  $J = 7.6$  Hz, 2H, N- $CH_2CH_2$ -indenyl), 6.26 (broad-s, 1H,  $CH$  in indenyl), 6.62 (d,  $J = 2.0$  Hz, 1H,  $CH$  in imidazole), 6.65 (d,  $J = 2.0$  Hz, 1H,  $CH$  in imidazole), 7.21-7.49 (m, 4H,  $CH$  in indenyl).  $^{13}C\{^1H\}$  NMR (in  $CDCl_3$ ):  $\delta$  11.5 ( $BCH_2CH_3$ ), 14.4 (broad,  $BCH_2CH_3$ ), 30.3 (indenyl- $CH_2CH_2$ -N), 37.9 (N- $CH_3$ ), 38.0 ( $CH_2$  in indenyl), 47.6 (N- $CH_2$ - $CH_2$ -indenyl), 118.6 ( $CH$  in indenyl), 119.8, 121.6 ( $CH$  in imidazole), 123.9, 124.8, 126.1, 130.2 ( $CH$  in indenyl), 140.1, 144.1, 144.4 (quaternary C in indenyl), 175.9 (broad, N-C-N).  $^{11}B\{^1H\}$  NMR (in  $CDCl_3$ ):  $\delta$  -11.5. HRMS (ESI) calcd for  $C_{15}H_{17}N_2 [M-BEt_3+H]^+$ : 225.1386, found: 225.1395.

Compound **2b** was prepared from **1b** (705 mg, 2.12 mmol) and LiBEt<sub>3</sub>H (2.2 mL of its 1.0 M THF solution, 2.2 mmol) in the same manner as that for **2a**. Compound **2b** was isolated as a yellow solid (597 mg, 1.70 mmol, 80%). <sup>1</sup>H NMR (in CDCl<sub>3</sub>): δ 0.51 (q, *J* = 7.3 Hz, 6H, BCH<sub>2</sub>CH<sub>3</sub>), 0.68 (t, *J* = 7.3 Hz, 9H, BCH<sub>2</sub>CH<sub>3</sub>), 1.38 (d, *J* = 6.6 Hz, 6H, CH<sub>3</sub> in *i*-Pr), 3.03 (dt, *J* = 1.3, 7.9 Hz, 2H, indenyl-CH<sub>2</sub>CH<sub>2</sub>-N), 3.36 (d, *J* = 1.3 Hz, 2H, CH<sub>2</sub> in indenyl), 4.56 (t, *J* = 7.9 Hz, 2H, N-CH<sub>2</sub>CH<sub>2</sub>-indenyl), 5.46 (sept, *J* = 6.6 Hz, 1H, CH in *i*-Pr), 6.26 (broad-s, 1H, CH in indenyl), 6.66 (d, *J* = 2.0 Hz, 1H, CH in imidazole), 6.85 (d, *J* = 2.0 Hz, 1H, CH in imidazole), 7.18-7.50 (m, 4H, CH in indenyl). <sup>13</sup>C{<sup>1</sup>H} NMR (in CDCl<sub>3</sub>): δ 11.6 (BCH<sub>2</sub>CH<sub>3</sub>), 14.4 (broad, BCH<sub>2</sub>CH<sub>3</sub>), 23.8 (CH<sub>3</sub> in *i*-Pr), 30.7 (indenyl-CH<sub>2</sub>CH<sub>2</sub>-N), 38.0 (CH<sub>2</sub> in indenyl), 47.7 (N-CH<sub>2</sub>-CH<sub>2</sub>-indenyl), 48.7 (CH in *i*-Pr), 115.4 (CH in imidazole), 118.6 (CH in indenyl), 120.9 (CH in imidazole), 123.8, 124.8, 126.1, 130.0 (CH in indenyl), 140.2, 144.1, 144.4 (quaternary C in indenyl), 174.3 (broad, N-C-N). <sup>11</sup>B{<sup>1</sup>H} NMR (in CDCl<sub>3</sub>): δ -11.3. HRMS (ESI) calcd for C<sub>17</sub>H<sub>21</sub>N<sub>2</sub> [M-BEt<sub>3</sub>+H]<sup>+</sup>: 253.1699, found: 253.1710.

#### S1-4. Preparation of **4a**

A solution of complex **3** (404 mg, 1.24 mmol) in THF (20 mL) was cooled to -78 °C, and then a THF solution of lithiated **2a**, which was prepared by the reaction of **2a** (439 mg, 1.36 mmol) with *n*-BuLi (0.91 mL of its 1.5 M hexane solution, 1.37 mmol) at -78 °C, was added. The reaction mixture was allowed to warm to room temperature. After several hours, the volatiles were removed under reduced pressure. The residual solid was extracted with toluene (25 mL) and then the filtrate was evaporated off under vacuum. The yellow solid was washed with pentane (10 mL x 2) and dried in vacuo to yield **4a** (569 mg, 1.08 mmol, 87%). Anal. Calcd for C<sub>27</sub>H<sub>37</sub>BMoN<sub>2</sub>O<sub>2</sub>: C, 61.38; H, 7.06; N, 5.30%. Found: C, 61.46; H, 6.85; N, 5.48%. IR (ν<sub>CO</sub>, KBr) 1950, 1856. <sup>1</sup>H NMR (in CDCl<sub>3</sub>): δ -0.77 (s, 1H, *anti*-CH<sub>2</sub> in metallyl), -0.73 (s, 1H, *anti*-CH<sub>2</sub> in metallyl), 0.50 (q, *J* = 6.6 Hz, 6H, BCH<sub>2</sub>CH<sub>3</sub>), 0.67 (t, *J* = 6.6 Hz, 9H, BCH<sub>2</sub>CH<sub>3</sub>), 1.42 (s, 3H, CH<sub>3</sub> in metallyl), 3.21-3.40 (m, 4H, *syn*-CH<sub>2</sub> in metallyl + indenyl-CH<sub>2</sub>CH<sub>2</sub>-N), 3.86 (s, 3H, N-CH<sub>3</sub>), 4.43-4.67 (m, 2H, N-CH<sub>2</sub>CH<sub>2</sub>-indenyl), 5.52 (d, *J* = 2.6 Hz, 1H, CH in indenyl), 5.87 (d, *J* = 2.6 Hz, 1H, CH in indenyl), 6.62 (d, *J* = 2.0 Hz, 1H, CH in imidazole), 6.67 (d, *J* = 2.0 Hz, 1H, CH in imidazole), 6.93-7.15 (m, 4H, CH in indenyl). <sup>13</sup>C{<sup>1</sup>H} NMR (in CDCl<sub>3</sub>): δ 11.4 (BCH<sub>2</sub>CH<sub>3</sub>), 14.3 (broad, BCH<sub>2</sub>CH<sub>3</sub>), 23.2 (CH<sub>3</sub> in metallyl), 31.2 (indenyl-CH<sub>2</sub>CH<sub>2</sub>-N), 37.8 (N-CH<sub>3</sub>), 50.2 (N-CH<sub>2</sub>CH<sub>2</sub>-indenyl), 57.3 (CH<sub>2</sub> in metallyl), 57.5 (CH<sub>2</sub> in metallyl), 75.8, 89.4 (CH in indenyl), 94.8 (CCH<sub>3</sub> in metallyl),

108.3 (quaternaryC in indenyl), 112.3 (quaternaryC in indenyl, overlapped), 120.1, 121.9, 122.6, 124.5, 124.7, 125.1 (CH in indenyl + CH in imidazole), 176.6 (broad, N-C-N), 240.3, 241.3 (CO).  $^{11}\text{B}\{^1\text{H}\}$  NMR (in  $\text{CDCl}_3$ ):  $\delta$  -10.9.

### S1-5. Preparation of 5a

Complex **4a** (61 mg, 0.12 mmol) and pyridine (5 mL) were put in a Schlenk tube. After being refluxed for 4 h, the volatiles were removed under reduced pressure. The residual solid was dissolved in  $\text{CH}_2\text{Cl}_2$  (ca 3 mL). This solution was loaded on an  $\text{Al}_2\text{O}_3$  column ( $\phi$  10 x 40 mm) and eluted with  $\text{CH}_2\text{Cl}_2$ /hexane (1/1). The red band was collected and dried in vacuo to give **5a** as a red solid (39 mg, 0.097 mmol, 81%). Anal. Calcd for  $\text{C}_{20}\text{H}_{22}\text{MoN}_2\text{O}$ : C, 59.70; H, 5.51; N, 6.96%. Found: C, 59.39; H, 5.53; N, 6.79%. IR ( $\nu_{\text{CO}}$ , KBr) 1794, 1773.  $^1\text{H}$  NMR (in  $\text{CDCl}_3$ ):  $\delta$  -1.24 (s, 1H, *anti*- $\text{CH}_2$  in metallyl), -0.17 (s, 1H, *anti*- $\text{CH}_2$  in metallyl), 1.63 (s, 3H,  $\text{CH}_3$  in metallyl), 1.90 (d,  $J = 3.6$  Hz, 1H, *syn*- $\text{CH}_2$  in metallyl), 2.22 (ddd,  $J = 14.2, 12.2, 3.6$  Hz, 1H, indenyl- $\text{CH}_2\text{CH}_2\text{-N}$ ), 2.85 (d,  $J = 3.6$  Hz, 1H, *syn*- $\text{CH}_2$  in metallyl), 3.32 (ddd,  $J = 14.2, 3.3, 2.3$  Hz, 1H, indenyl- $\text{CH}_2\text{CH}_2\text{-N}$ ), 3.50 (s, 3H, N- $\text{CH}_3$ ), 4.15-4.34 (m, 2H, N- $\text{CH}_2\text{CH}_2\text{-indenyl}$ ), 5.21 (d,  $J = 2.6$  Hz, 1H, CH in indenyl), 5.44 (d,  $J = 2.6$  Hz, 1H, CH in indenyl), 6.82 (d,  $J = 2.0$  Hz, 1H, CH in imidazole), 7.05 (d,  $J = 2.0$  Hz, 1H, CH in imidazole), 6.84-7.12 (m, 4H, CH in indenyl).  $^{13}\text{C}\{^1\text{H}\}$  NMR (in  $\text{CDCl}_3$ ):  $\delta$  24.7 ( $\text{CH}_3$  in metallyl), 27.4 (indenyl- $\text{CH}_2\text{CH}_2\text{-N}$ ), 39.6 (N- $\text{CH}_3$ ), 52.4 (N- $\text{CH}_2\text{CH}_2\text{-indenyl}$ ), 53.8 ( $\text{CH}_2$  in metallyl), 59.8 ( $\text{CH}_2$  in metallyl), 73.8, 89.6 (CH in indenyl), 93.6 (quaternaryC in metallyl), 103.9, 108.3, 110.8 (quaternaryC in indenyl), 121.2, 121.8, 122.2, 122.5, 123.2, 127.1 (CH in indenyl + CH in imidazole), 201.0 (N-C-N), 260.6 (CO).

### S1-6. Preparation of 7a

Complexes **4a** (91 mg, 0.17 mmol) and **6** (80 mg, 0.17 mmol) were put in a Schlenk tube, which was attached to a high-vacuum line. Heptane (ca. 10 mL) was added by a trap-to-trap-transfer technique at  $-78$  °C. After being refluxed for 2.5 h, a yellow solid was precipitated. The resulting yellow precipitates were isolated by filtration, washed with hexane, and dried in vacuo to give **7a** (102 mg). The yellow filtrate was cooled to form further yellow precipitates, which was collected and dried in vacuo to give **7a** (12 mg). Complex **6a** was totally obtained in 82% yield (114 mg, 0.14 mmol). Anal. Calcd for  $\text{C}_{39}\text{H}_{38}\text{Mo}_2\text{N}_4\text{O}_4$ : C, 57.22; H, 4.68; N, 6.84%. Found. C, 57.33; H, 4.68; N, 6.85%. IR ( $\nu_{\text{CO}}$ , KBr) 1949, 1914,

1874, 1822.  $^1\text{H}$  NMR (in  $\text{CDCl}_3$ ):  $\delta$  -0.84 (s, 1H, *anti*- $\text{CH}_2$  in metallyl), -0.73 (s, 1H, *anti*- $\text{CH}_2$  in metallyl), 1.39 (s, 3H,  $\text{CH}_3$  in metallyl), 1.66 (d,  $J = 9.6$  Hz, 1H, *anti*- $\text{CH}_2$  in allyl), 1.77 (d,  $J = 9.6$  Hz, 1H, *anti*- $\text{CH}_2$  in allyl), 3.11-3.22 (m, 1H, indenyl- $\text{CH}_2\text{CH}_2\text{-N}$ ), 3.32 (d,  $J = 3.3$  Hz, 1H, *syn*- $\text{CH}_2$  in metallyl), 3.37 (d,  $J = 3.3$  Hz, 1H, *syn*- $\text{CH}_2$  in metallyl), 3.31-3.44 (m, 1H, indenyl- $\text{CH}_2\text{CH}_2\text{-N}$ ), 3.44 (s, 3H,  $\text{N-CH}_3$ ), 3.65-3.97 (m, 2H,  $\text{N-CH}_2\text{CH}_2\text{-indenyl}$ ), 4.00-4.25 (m, 3H, *syn*- $\text{CH}_2$  in allyl +  $\text{CH}$  in allyl), 5.37 (broad-s,  $\text{CH}$  in indenyl), 5.82 (d,  $J = 3.0$  Hz, 1H,  $\text{CH}$  in indenyl), 6.71–7.10 (m, 16H, Ph +  $\text{CH}$  imidazole +  $\text{CH}$  in indenyl), 8.37 (s, 1H,  $\text{CH}$  in amidinato).  $^{13}\text{C}\{^1\text{H}\}$  NMR (in  $\text{CDCl}_3$ ):  $\delta$  23.2 ( $\text{CH}_3$  in metallyl), 30.0 (indenyl- $\text{CH}_2\text{CH}_2\text{-N}$ ), 38.9 ( $\text{N-CH}_3$ ), 51.8 ( $\text{N-CH}_2\text{CH}_2\text{-indenyl}$ ), 57.0 ( $\text{CH}_2$  in metallyl), 57.4 ( $\text{CH}_2$  in metallyl), 59.1, 61.2 ( $\text{CH}_2$  in allyl), 75.4 ( $\text{CH}$  in indenyl), 85.2 ( $\text{CH}$  in allyl), 89.0 ( $\text{CH}$  in indenyl-5ring), 94.9 (quaternaryC in metallyl), 108.1, 112.2, 112.2 (quaternaryC in indenyl), 118.4, 118.8, 120.4, 121.2, 121.5, 122.9, 122.9, 124.3, 124.4, 124.8, 129.0, 129.1, 147.6, 147.9 (Ph +  $\text{CH}$  in indenyl +  $\text{CH}$  in imidazole), 154.7 (amidinato- $\text{CH}$ ), 193.0 ( $\text{N-C-N}$ ), 229.4, 229.7, 240.4, 241.4 ( $\text{CO}$ ).

## S2. Single-crystal X-ray crystallography

### S2-1. Experimental procedure for X-ray analyses

Suitable single crystals were obtained by recrystallization from hexane (**4a**) or from toluene/hexane (**5a** and **7a**) and are individually mounted on glass fibers. Indexing was performed from 3 oscillations, which were exposed for 30 seconds (**4a**), 45 seconds (**5a**), and 90 seconds (**7a**), respectively, using a Rigaku RAXIS-RAPID Imaging Plate diffractometer with graphite-monochromated  $\text{Cu-K}\alpha$  radiation ( $\lambda = 1.54187 \text{ \AA}$ ). The crystal-to-detector distance was 127.40 mm. The data were collected at a temperature of  $23 \pm 1 \text{ }^\circ\text{C}$  to a maximum  $2\theta$  value of  $136.5^\circ$ . The collected oscillation images were 24 for **4a**, 24 for **5a**, and 36 for **7a**. Readout was performed in the 0.100 mm pixel mode.

Crystallographic data and the results of measurement are summarized in Table S1. The structures were solved by direct methods (SIR92)<sup>5</sup> for all complexes, and expanded using Fourier techniques (DIRDIF99).<sup>6</sup> Least-square refinements were carried out using SHELXL97.<sup>7</sup> All of the non-hydrogen atoms were refined anisotropically. Hydrogen atoms were introduced at the ideal positions and refined using the riding model. All calculations were performed using the CrystalStructure crystallographic software package.<sup>8</sup>

**Table S1.** Summary of Crystal Data for Complexes **4a**, **5a**, and **7a**

|                                                                          | <b>4a</b>                                                        | <b>5a</b>                                          | <b>7a</b>                                                                     |
|--------------------------------------------------------------------------|------------------------------------------------------------------|----------------------------------------------------|-------------------------------------------------------------------------------|
| Empirical Formula                                                        | C <sub>27</sub> H <sub>37</sub> BMoN <sub>2</sub> O <sub>2</sub> | C <sub>20</sub> H <sub>22</sub> MoN <sub>2</sub> O | C <sub>39</sub> H <sub>38</sub> Mo <sub>2</sub> N <sub>4</sub> O <sub>4</sub> |
| Formula weight                                                           | 528.35                                                           | 402.35                                             | 818.63                                                                        |
| Crystal color, habit                                                     | yellow, needle                                                   | red, plate                                         | yellow, needle                                                                |
| Crystal size/mm                                                          | 0.50 x 0.25 x 0.18                                               | 0.25 x 0.18 x 0.08                                 | 0.20 x 0.10 x 0.08                                                            |
| Crystal system                                                           | monoclinic                                                       | monoclinic                                         | monoclinic                                                                    |
| Space group                                                              | <i>P2<sub>1</sub>/c</i> (#14)                                    | <i>P2<sub>1</sub>/c</i> (#14)                      | <i>P2<sub>1</sub>/a</i> (#14)                                                 |
| Lattice parameters                                                       |                                                                  |                                                    |                                                                               |
| <i>a</i> /Å                                                              | 6.8287(15)                                                       | 8.7708(11)                                         | 7.411(2)                                                                      |
| <i>b</i> /Å                                                              | 26.711(5)                                                        | 16.5056(17)                                        | 38.544(8)                                                                     |
| <i>c</i> /Å                                                              | 14.680(3)                                                        | 12.1411(13)                                        | 13.169(3)                                                                     |
| $\beta$ /°                                                               | 97.025(5)                                                        | 91.388(10)                                         | 76.26(2)                                                                      |
| <i>V</i> /Å <sup>3</sup>                                                 | 2657.6(9)                                                        | 1757.1(3)                                          | 3654.0(15)                                                                    |
| <i>Z</i>                                                                 | 4                                                                | 4                                                  | 4                                                                             |
| <i>D<sub>c</sub></i> /g cm <sup>-3</sup>                                 | 1.320                                                            | 1.521                                              | 1.488                                                                         |
| <i>F</i> <sub>000</sub>                                                  | 1104.00                                                          | 824.00                                             | 1664.00                                                                       |
| $\mu$ (Cu- <i>K</i> $\alpha$ )/cm <sup>-1</sup>                          | 42.118                                                           | 61.458                                             | 59.673                                                                        |
| Reflection measured                                                      | 22903                                                            | 13487                                              | 29621                                                                         |
| Independent reflections ( <i>R</i> <sub>int</sub> )                      | 4646 (0.055)                                                     | 3066 (0.073)                                       | 6121 (0.111)                                                                  |
| No. variables                                                            | 299                                                              | 218                                                | 443                                                                           |
| Reflection/parameter ratio                                               | 15.54                                                            | 14.06                                              | 13.82                                                                         |
| Residuals: <i>R</i> ; <i>R</i> <sub>w</sub>                              | 0.0538; 0.1130                                                   | 0.0419; 0.0832                                     | 0.1616; 0.1044                                                                |
| Residuals: <i>R</i> <sub>1</sub> ( <i>I</i> > 2.0 $\sigma$ ( <i>I</i> )) | 0.0393                                                           | 0.0334                                             | 0.0594                                                                        |
| Goodness of fit indicator                                                | 1.076                                                            | 1.050                                              | 0.870                                                                         |
| $\delta\rho_{\max, \min}$ /e Å <sup>-3</sup>                             | 0.59, -0.46                                                      | 0.44, -0.65                                        | 0.74, -0.45                                                                   |

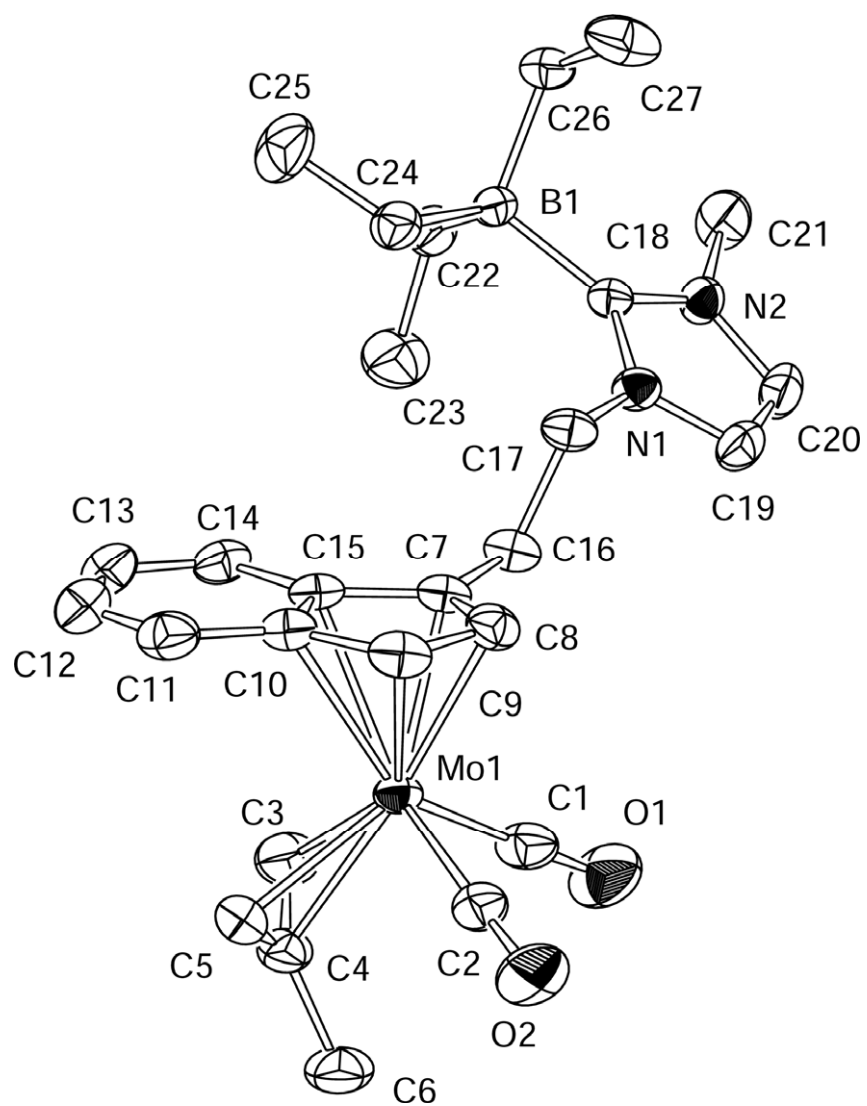

**Figure S1.** ORTEP drawing of **4a** (30% probability of thermal ellipsoids) showing the numbering system. All hydrogen atoms are omitted for clarity.



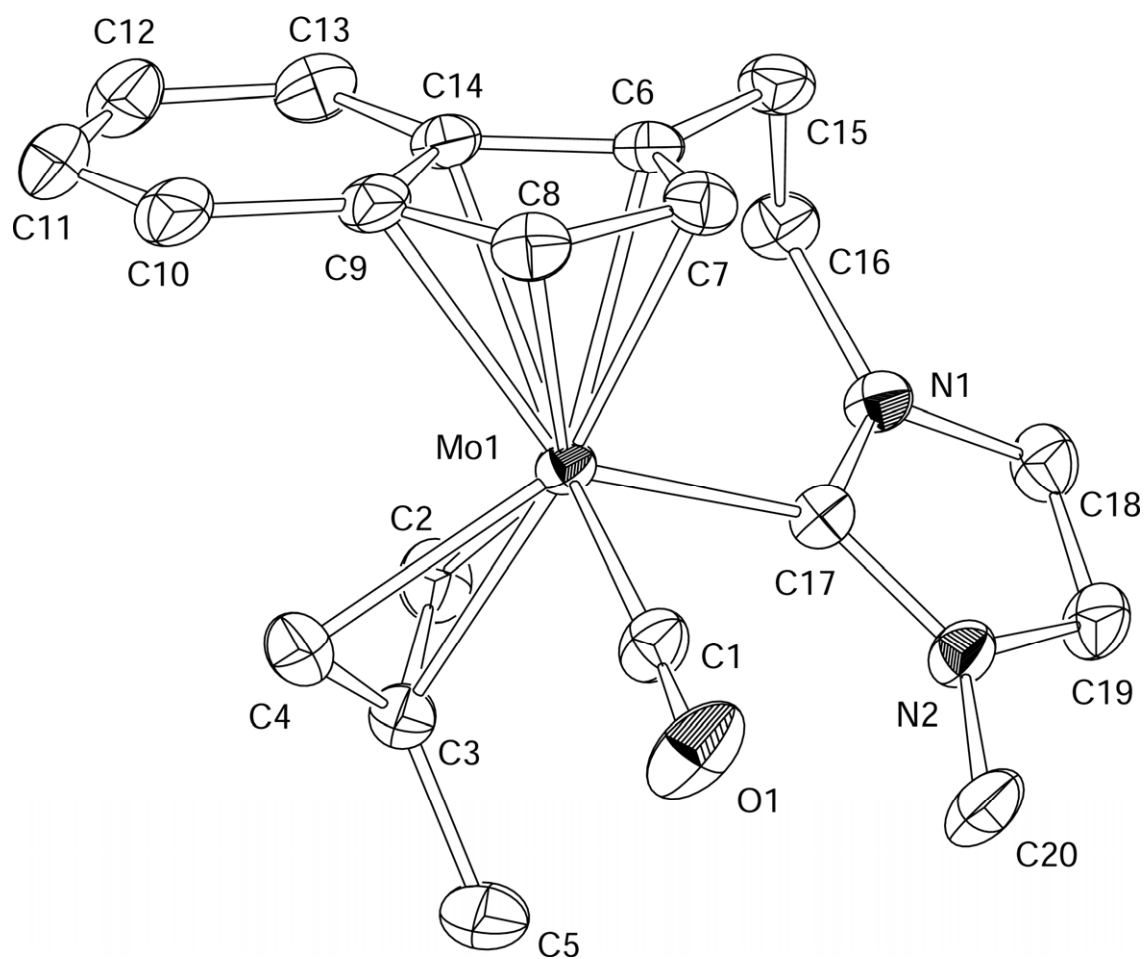

**Figure S2.** ORTEP drawing of **5a** (30% probability of thermal ellipsoids) showing the numbering system. All hydrogen atoms are omitted for clarity.

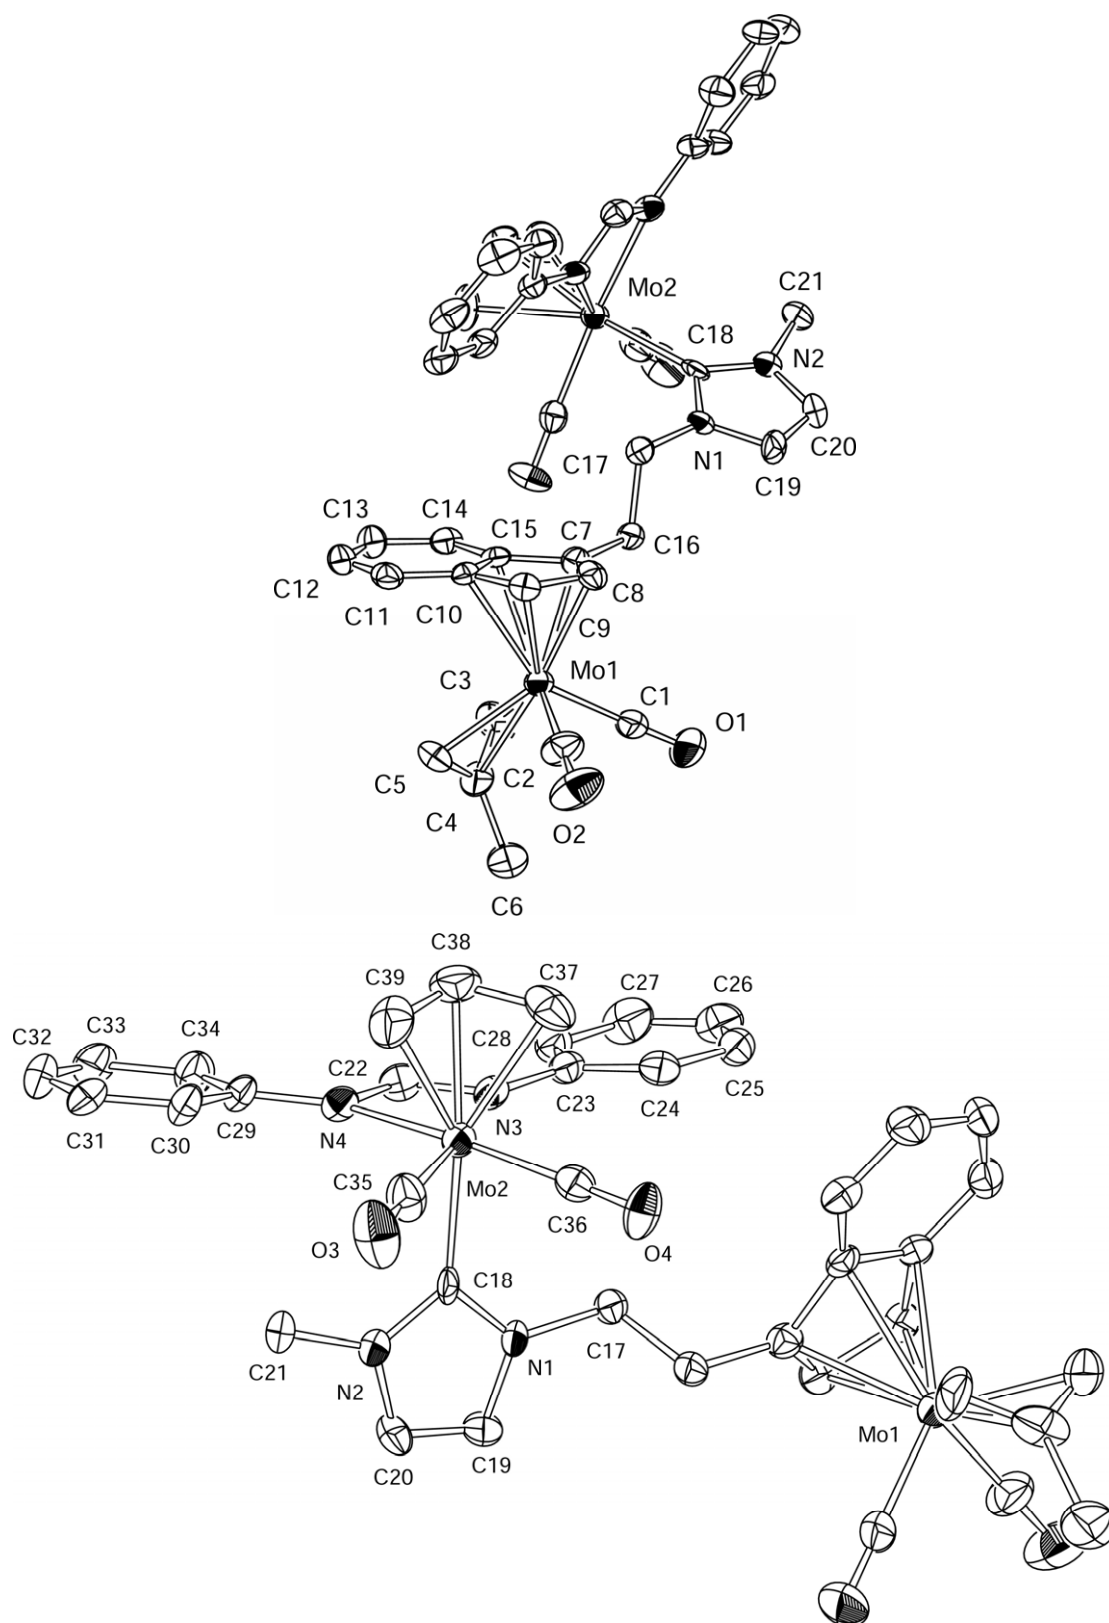

**Figure S3.** ORTEP drawings of **7a** (30% probability of thermal ellipsoids) showing the numbering system. All hydrogen atoms are omitted for clarity.

### S3. References

- 1 M. Deppner, R. Burger, H. G. Alt, *J. Organomet. Chem.*, 2004, **689**, 1194-1211.
- 2 O. V. Starikova, G. V. Dolgushin, L. I. Larina, T. N. Komarova and V. A. Lopyrev, *Arkivoc*, 2003 (xiii), 119-124.
- 3 (a) R. G. Hayter, *J. Organomet. Chem.*, 1968, **13**, P1-P3; (b) H. tom Dieck and H. Friedel, *J. Organomet. Chem.*, 1968, **14**, 375-385.
- 4 Y. Yamaguchi, K. Ogata, K. Kobayashi and T. Ito, *Inorg. Chim. Acta*, 2004, **357**, 2657-2668.
- 5 A. Altomare, G. Cascarano, C. Giacovazzo, A. Guagliardi, M. C. Burla, G. Polidori and M. Camalli, *J. Appl. Cryst.*, 1994, **27**, 435.
- 6 P. T. Beurskens, G. Admiraal, G. Beurskens, W. P. Bosman, R. de Gelder, R. Israel and J.M.M. Smits, The DIRDIF-99 program system, Technical Report of the Crystallography Laboratory, University of Nijmegen, The Netherlands, DIRDIF99; 1999.
- 7 G. M. Sheldrick, Program for the Refinement of Crystal Structures. University of Göttingen, Germany, SHELX97; 1997.
- 8 Crystal Structure Analysis Package, Rigaku and Rigaku Americas, CrystalStructure 3.8; 2000-2007.
